# Supplementary material for: Using Task-Evoked Pupillary Response to Predict Clinical Performance during a Simulation Training
Source: MDPI journal article supplement (doi:10.3390/healthcare11040455), 2023-02-04
Supplement: s1 [file s1]

**Table S1.** Verification checklist of the intervention performance.

| Interventions                                                                                       | Correctness |
|-----------------------------------------------------------------------------------------------------|-------------|
| 1. Assessment of consciousness, breathing, placement of Guedel cannula (unresponsive, no breathing) |             |
| 2. Request for help: call a physician                                                               |             |
| 3. Placing the patient in the supine decubitus position                                             |             |
| 4. Introduction of the cardiac massage table                                                        |             |
| 5. Monitoring the patient: checking the rhythm on the monitor                                       |             |
| 6. Checking the pulse                                                                               |             |
| 7. Defibrillation: correct placement of paddles or electrodes apical and sternal                    |             |
| 8. Correct selection of shock power: shock                                                          |             |
| 9. Introduction of the cardiac massage table                                                        |             |
| 10. Starting the massage                                                                            |             |
